# Supplementary material
Source: PubMed Central journal article supplement (PMC3790864)
Supplement: NIHMS511998-supplement-Supp__Figure_S1.pdf [file NIHMS511998-supplement-Supp__Figure_S1.pdf]

Supplementary Figure S1

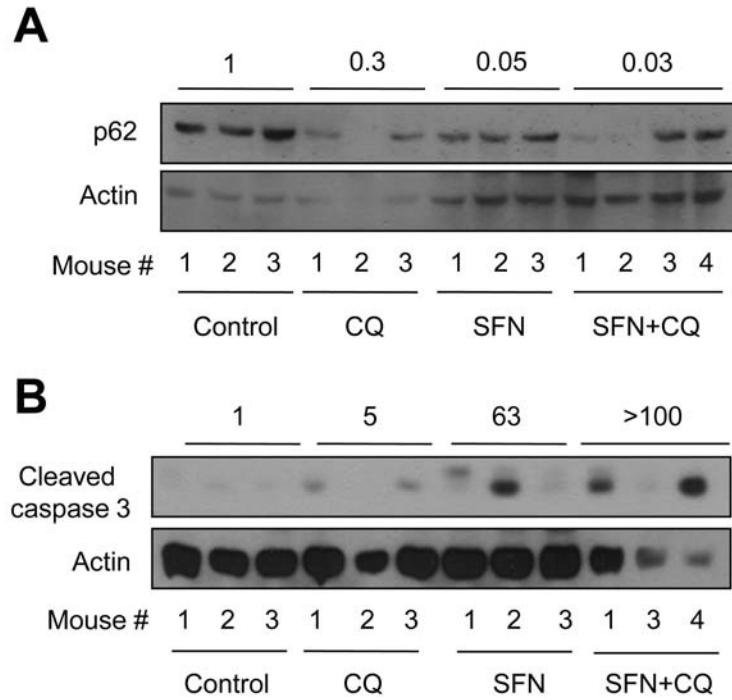

Supplementary Figure S1: Effects of sulforaphane (SFN) and/or chloroquine (CQ) treatments on markers of autophagy (p62) and cleaved caspase-3 in tumor supernatants of control (n=3), CQ (n=3), SFN (n=3) and SFN+CQ (n=3 or 4) mice. Average densitometric quantitation results are shown.
