# Supplementary material
Source: PubMed Central journal article supplement (PMC3790864)
Supplement: NIHMS511998-supplement-Supp__Table_S1.pdf [file NIHMS511998-supplement-Supp__Table_S1.pdf]

**Supplementary Table S1: Causes for removal of some mice from the study**

|                                                            | Control | CQ | SFN | SFN+CQ |
|------------------------------------------------------------|---------|----|-----|--------|
| Number of mice initially placed on the study               | 32      | 32 | 35  | 29     |
| Number of mice removed from study                          | 4       | 7  | 7   | 4      |
| <u>Cause for removal from the study</u>                    |         |    |     |        |
| Died of unknown cause                                      | 0       | 2  | 0   | 0      |
| Enlarged seminal vesicles                                  | 1       | 0  | 0   | 0      |
| Kidney tumor                                               | 1       | 1  | 1   | 0      |
| Salivary gland tumor                                       | 0       | 0  | 1   | 0      |
| Euthanized due to prolapsed rectum                         | 0       | 1  | 0   | 0      |
| Euthanized due to hind limb paralysis                      | 0       | 1  | 0   | 0      |
| Morbidity due to premature tumor development (10-15 weeks) | 2       | 2  | 4   | 3      |
| Euthanized due to excessive weight loss                    | 0       | 0  | 1   | 1      |
| Number of evaluable mice                                   | 28      | 25 | 28  | 25     |
